# Supplementary material for: Life Cycle Sustainability Assessment of a Multi-Technology Action for Food Loss and Waste Prevention
Source: Research Square preprint supplement (doi:10.21203/rs.3.rs-8233539/v1), 2025-12-17
Supplement: Supplementary file 1 [file 644deb38539dbb8e850b4925.xlsx]

## Sheet: Title page
Life Cycle Sustainability Assessment of a Multi-Technology Action for Food Loss and Waste Prevention
Supplementary Material
Environmental, Social and Economic Impact Data

## Sheet: environmental impacts raw data
ENVIRONMENTAL IMPACTS - RAW DATA
SimaPro 9.6.0.1		Date	2025-05-08
Calculation:	Analysis
Results:	Impact Assessment
Product:	1 kg Potato {RoW}| production | APOS, U (del proyecto Ecoinvent 3 - allocation at point of substitution - unit)
Método:	Environmental Footprint 3.1 (adapted) V1.01 / EF 3.1 normalization and weighting set
Indicador:	Weighting
Skip categories:	Never
Default units:	No
Excluir procesos de infrastructura:	No
Excluir emisiones a largo plazo:	No
Per impact category:	No
Sorted on item:	Category Damage
Sort order:	Ascending
Daño de categoría	Unidad	Potato {RoW}| production | APOS, U	5ª gama (SLICED POTATO) 1kg of product {ES} U	Pulp, Pressed, Potato, at feed plant U	Potato starch {RoW}| production | APOS, U
Total	µPt	42.0049	14.5458	1.07307	297.478
Acidification	µPt	2.17623	0.977004	0.0579049	30.8202
Climate change	µPt	4.01392	3.86572	0.409252	38.61
Ecotoxicity, freshwater	µPt	7.78293	0.30093	0.0139568	15.2971
Particulate matter	µPt	2.21206	0.491902	0.101504	31.3192
Eutrophication, marine	µPt	3.47664	0.542514	0.0167967	19.756
Eutrophication, freshwater	µPt	4.42129	0.83299	0.0230091	11.7587
Eutrophication, terrestrial	µPt	1.51677	0.330421	0.0231465	23.6203
Human toxicity, cancer	µPt	0.414156	0.113615	0.00532769	2.63894
Human toxicity, non-cancer	µPt	1.60392	0.312639	0.0105518	11.8802
Ionising radiation	µPt	0.0799255	0.777635	0.0096271	0.977183
Land use	µPt	1.30045	0.0375417	0.00560729	8.09478
Ozone depletion	µPt	0.0352563	0.0152014	0.00298822	0.199041
Photochemical ozone formation	µPt	0.640837	0.482696	0.0405698	8.35408
Resource use, fossils	µPt	1.84712	3.7077	0.283777	18.1528
Resource use, minerals and metals	µPt	2.45348	0.418144	0.0233466	25.5795
Water use	µPt	8.02993	1.33917	0.045702	50.4201
					1 kg of potato = 0.250 kg starch
				1 Kg of potato = 0.600 Kg feed
			1 kg potato = 0.91 kg fifth gama potato
Impact category	Unit	Electricity, low voltage {ES}| market for | APOS, U
Total	µPt	38.72
Acidification	µPt	3.25
Climate change	µPt	8.99
Ecotoxicity, freshwater	µPt	0.27
Particulate matter	µPt	1.28
Eutrophication, marine	µPt	0.68
Eutrophication, freshwater	µPt	2.28
Eutrophication, terrestrial	µPt	0.98
Human toxicity, cancer	µPt	0.23
Human toxicity, non-cancer	µPt	0.7
Ionising radiation	µPt	2.76
Land use	µPt	0.13
Ozone depletion	µPt	0.03
Photochemical ozone formation	µPt	1.49
Resource use, fossils	µPt	9.84
Resource use, minerals and metals	µPt	4.19
Water use	µPt	1.62

## Sheet: social impacts raw data
SOCIAL IMPACTS - RAW DATA
SimaPro 9.1.0.8		Date	2025-04-10
Calculation:	Analyze
Results:	Impact assessment
Product:	1 kg potato//[RoW] potato production (del proyecto i-WAYS_(SEGUNDA PARTE))
Método:	SHDB V1.00
Indicador:	Characterization
Skip categories:	Never
Excluir procesos de infrastructura:	Yes
Excluir emisiones a largo plazo:	Yes
Sorted on item:	Impact category
Sort order:	Ascending
						acetamide-anillide-compound, unspecified//[GLO] market for acetamide-anillide-compound, unspecified	ammonium nitrate, as N//[GLO] market for ammonium nitrate, as N	application of plant protection product, by field sprayer//[CH] market for application of plant protection product, by field sprayer	bipyridylium-compound//[GLO] market for bipyridylium-compound	dinitroaniline-compound//[GLO] market for dinitroaniline-compound	dithiocarbamate-compound//[GLO] market for dithiocarbamate-compound	fertilising, by broadcaster//[GLO] market for fertilising, by broadcaster	glyphosate//[GLO] market for glyphosate	harvesting, by complete harvester, ground crops//[GLO] market for harvesting, by complete harvester, ground crops	irrigation//[BR] market for irrigation	irrigation//[CH] market for irrigation	irrigation//[DE] market for irrigation	irrigation//[ES] market for irrigation	irrigation//[FR] market for irrigation	irrigation//[MY] market for irrigation	irrigation//[PH] market for irrigation	irrigation//[TN] market for irrigation	nitrogen fertiliser, as N//[GLO] market for nitrogen fertiliser, as N	organophosphorus-compound, unspecified//[GLO] market for organophosphorus-compound, unspecified	pesticide, unspecified//[GLO] market for pesticide, unspecified	phenoxy-compound//[GLO] market for phenoxy-compound	phosphate fertiliser, as P2O5//[GLO] market for phosphate fertiliser, as P2O5	potassium chloride, as K2O//[GLO] market for potassium chloride, as K2O	potato grading//[GLO] market for potato grading	potato haulm cutting//[GLO] market for potato haulm cutting	potato planting//[GLO] market for potato planting	potato seed, for setting//[GLO] market for potato seed, for setting	pyridazine-compound//[GLO] market for pyridazine-compound	tillage, cultivating, chiselling//[GLO] market for tillage, cultivating, chiselling	tillage, harrowing, by spring tine harrow//[GLO] market for tillage, harrowing, by spring tine harrow	tillage, hoeing and earthing-up, potatoes//[GLO] market for tillage, hoeing and earthing-up, potatoes	tillage, ploughing//[GLO] market for tillage, ploughing	triazine-compound, unspecified//[GLO] market for triazine-compound, unspecified	urea, as N//[GLO] market for urea, as N	ammonia, liquid//[RoW] market for ammonia, liquid
Impact Category	Unit	Total	potato//[RoW] potato production	[sulfonyl]urea-compound//[GLO] market for [sulfonyl]urea-compound	[thio]carbamate-compound//[GLO] market for [thio]carbamate-compound	2.88537e-05	0.00157593	0.000286188	2.15192e-05	1.32836e-05	0.000235554	0.00122472	1.43037e-06	0.00981294	0.00687675	6.13821e-06	0.000796156	0.00283857	0.000389903	0.00618359	0.3667	0.00427764	0.00444972	0.000140725	0.00645679	9.9871e-06	0.0044443	0.00147352	0.00275751	0.00134505	0.00247002	0.0185129	2.0141e-05	0.00216365	0.00256942	0.00259907	0.0036074	2.25954e-05	0.000858514	0.00104563
total - Child Labor	p	1.15417	0.694562	5.6486e-06	0.00338795	3.07131e-05	0.00170036	0.000324763	2.1861e-05	1.37074e-05	0.000246763	0.00139777	1.54191e-06	0.0111774	0.0322683	6.39997e-06	0.000810775	0.00364998	0.00039233	0.00172865	0.0186367	0.000767609	0.00464184	0.000146536	0.00649681	1.03816e-05	0.00490502	0.00145926	0.00311418	0.00151771	0.00280353	0.0207619	2.16226e-05	0.00246862	0.00291399	0.00294718	0.00412187	2.47961e-05	0.000921671	0.00104404
total - Forced Labor	p	0.6045	0.467408	5.99418e-06	0.00359021	2.05084e-05	0.00101201	0.000261652	1.54801e-05	9.27546e-06	0.000170143	0.000946957	1.05239e-06	0.00761419	0.00318417	4.7068e-06	0.000578876	0.00286599	0.000299802	0.00159017	0.18743	0.000635487	0.00288313	0.000102034	0.00465166	7.13701e-06	0.00303584	0.000858764	0.00203821	0.00103288	0.00190574	0.01348	1.44284e-05	0.00167275	0.0019716	0.00200523	0.00278626	1.61027e-05	0.000573477	0.000712253
total - Excessive Working Time	p	0.585652	0.33684	4.08409e-06	0.00242001	4.11622e-05	0.00190959	0.000726518	2.84907e-05	1.7624e-05	0.000330954	0.00240818	2.15131e-06	0.0191666	0.0585359	1.52341e-05	0.00138041	0.0152024	0.00108091	0.0033876	0.0967338	0.00599179	0.00545157	0.000197527	0.00840026	1.36145e-05	0.00684626	0.00200904	0.0051598	0.00260759	0.00482922	0.0340003	2.92523e-05	0.00427212	0.00502418	0.00509908	0.00713673	3.41066e-05	0.00116313	0.00140102
total - Injuries and Fatalities	p	0.994869	0.689408	8.04269e-06	0.00481897	7.67823e-05	0.00373522	0.000932401	5.42294e-05	3.32315e-05	0.000620602	0.00292876	4.15394e-06	0.0235458	0.0330028	1.80928e-05	0.00213609	0.0125546	0.00113819	0.02917	0.923514	0.00137353	0.0105388	0.000382805	0.0161589	2.57902e-05	0.0115728	0.00328095	0.00687098	0.00317905	0.00583708	0.0450486	5.45712e-05	0.00511521	0.00596874	0.0060699	0.00851928	6.22105e-05	0.00216668	0.00245621
total - Toxics and Hazards	p	1.92071	0.74351	1.50935e-05	0.00903892	8.04533e-05	0.00389355	0.000854399	5.64073e-05	3.53248e-05	0.000638218	0.003896	4.21998e-06	0.0311136	0.0670893	1.68971e-05	0.00218506	0.0210974	0.00132972	0.0128684	0.745398	0.00104178	0.0114094	0.000392936	0.016743	2.69294e-05	0.0123306	0.00379276	0.00863902	0.00420027	0.00783104	0.0575044	5.69217e-05	0.00690832	0.00814431	0.00826941	0.0115361	6.55971e-05	0.00221414	0.00243178
total - Wage Assessment	p	2.91626	1.85272	1.56705e-05	0.00942276	3.1827e-05	0.00164731	0.000372689	2.24943e-05	1.41242e-05	0.000256026	0.00146138	1.60311e-06	0.0117064	0.0078879	7.21758e-06	0.00091678	0.00406397	0.000465931	0.00189597	0.193523	0.00237638	0.00463725	0.000151614	0.00666237	1.06743e-05	0.00520566	0.00156991	0.00341048	0.00159863	0.00293461	0.0224417	2.2416e-05	0.00257765	0.00304814	0.00308213	0.00429847	2.5904e-05	0.000951125	0.00116653
total - Poverty	p	0.949762	0.655591	6.20529e-06	0.00371764	3.18603e-05	0.00148874	0.000355033	2.20821e-05	1.35619e-05	0.000255748	0.0013972	1.73499e-06	0.0111802	0.00761426	6.86197e-06	0.000888732	0.0123334	0.000421648	0.000744239	0.052598	0.000386397	0.00420502	0.000157662	0.00654764	1.05724e-05	0.00479111	0.00134238	0.00321657	0.00151015	0.0027873	0.0209436	2.27223e-05	0.00245217	0.00286011	0.0029112	0.00409124	2.61237e-05	0.000869768	0.000941166
total - Migrant Labor	p	0.417625	0.264446	6.25982e-06	0.00374618	9.30987e-05	0.00488579	0.00113705	6.81889e-05	4.1475e-05	0.000764313	0.00402156	4.94983e-06	0.0322076	0.0355258	2.08646e-05	0.00258256	0.0114249	0.00129614	0.0296089	0.423945	0.00371894	0.013687	0.000467954	0.0205105	3.18728e-05	0.0132565	0.00415633	0.0084453	0.00432669	0.00803068	0.0560664	6.5644e-05	0.00708273	0.00828808	0.00843394	0.0117926	7.32157e-05	0.00271649	0.00313457
total - Collective Bargaining	p	2.09751	1.36459	1.8293e-05	0.0109943	8.75992e-06	0.00031689	8.68883e-05	5.64203e-06	3.51621e-06	6.96495e-05	0.000727319	4.82731e-07	0.0057292	0.0179897	2.38054e-06	0.0003227	0.00122172	0.000161751	0.00576274	0.18541	0.000338759	0.000933832	4.2147e-05	0.00162456	2.7771e-06	0.00166687	0.000432231	0.00141951	0.000772351	0.00145995	0.00968143	6.33352e-06	0.0013043	0.00152921	0.0015555	0.0021907	7.68004e-06	0.000221304	0.000243196
total - Indigenous Rights	p	0.490251	0.245978	1.72121e-06	0.00101841	2.46984e-05	0.00118262	0.000275392	1.72568e-05	1.07472e-05	0.00019807	0.00118834	1.26991e-06	0.00950268	0.00688578	5.36873e-06	0.000703337	0.00254095	0.000346425	0.0017197	0.0499884	0.00211569	0.00334373	0.000118214	0.00509218	8.22141e-06	0.00407564	0.00113571	0.00276183	0.0012963	0.00238435	0.0181089	1.74925e-05	0.00209669	0.00247075	0.00250318	0.00350033	2.03572e-05	0.000707627	0.000855756
total - Gender Equity	p	0.574426	0.444332	4.83523e-06	0.00288505	3.472e-05	0.00184059	0.00040806	2.47642e-05	1.53006e-05	0.000283387	0.00170567	1.78319e-06	0.0136116	0.0213265	7.7499e-06	0.000986961	0.00346293	0.000504312	0.00634435	0.373491	0.0023782	0.00500249	0.000167715	0.00735858	1.16995e-05	0.00559309	0.00161038	0.00366452	0.00184515	0.00341783	0.0244528	2.45482e-05	0.00301397	0.00354646	0.00359753	0.005029	2.80657e-05	0.0010389	0.00121604
total - High Conflict	p	1.06304	0.561923	6.83803e-06	0.00406845	3.2394e-05	0.00175395	0.000362318	2.3216e-05	1.45343e-05	0.000261093	0.00133999	1.65429e-06	0.0107486	0.00767551	6.78462e-06	0.000864991	0.0039193	0.00044605	0.0062454	0.189649	0.00222673	0.00493917	0.000157325	0.0069287	1.09723e-05	0.0049888	0.00158512	0.0030828	0.00146076	0.00268673	0.0205929	2.27655e-05	0.00235794	0.0027849	0.00281811	0.00392652	2.58895e-05	0.000973119	0.00114468
total - Legal System	p	1.01339	0.723526	6.30502e-06	0.00379893	3.70162e-05	0.0019485	0.000417829	2.55167e-05	1.61414e-05	0.000292125	0.00170959	1.95159e-06	0.0136343	0.00562875	8.187e-06	0.00104862	0.00454963	0.000534143	0.0064001	0.370845	0.00068951	0.0054738	0.000179882	0.00757583	1.22731e-05	0.00571516	0.00183019	0.00391939	0.00184967	0.00342046	0.0258121	2.61689e-05	0.00301621	0.00354522	0.00359575	0.00503056	3.01081e-05	0.00110451	0.00123611
total - Corruption	p	1.27115	0.78564	7.13651e-06	0.00433816	1.3006e-05	0.000810693	0.000141167	9.39432e-06	6.09758e-06	0.000104219	0.000552444	6.1099e-07	0.00439108	0.00195004	2.46731e-06	0.000314694	0.00120194	0.000154895	0.000394294	0.0390693	0.000215024	0.00227033	6.06384e-05	0.00280042	4.43722e-06	0.00211631	0.0007285	0.00114632	0.0006002	0.00111021	0.00814265	9.01748e-06	0.000977607	0.00116921	0.00117363	0.0016285	1.02961e-05	0.000426302	0.000526285
total - Drinking Water	p	0.524938	0.449189	2.50254e-06	0.00151424	2.19558e-05	0.00125128	0.000234144	1.54357e-05	9.85687e-06	0.000175958	0.00086778	1.08565e-06	0.00697266	0.00615334	4.47914e-06	0.00056954	0.00203381	0.000277312	0.000606607	0.187247	0.000316805	0.00346736	0.000103364	0.00457128	7.37165e-06	0.00359934	0.00112261	0.00201231	0.000954417	0.00174331	0.0135215	1.54332e-05	0.00152246	0.00180662	0.00182207	0.00253604	1.78223e-05	0.000670489	0.000768556
total - Improved Sanitation	p	0.631251	0.381666	4.27333e-06	0.00255977	2.21721e-05	0.00113083	0.000249151	1.61299e-05	9.94808e-06	0.000181267	0.000966737	1.12195e-06	0.00778959	0.019551	4.78557e-06	0.00062065	0.00310599	0.000305613	0.0060354	0.187845	0.00223657	0.00319413	0.0001076	0.00480678	7.55101e-06	0.00356341	0.00104268	0.00225188	0.00106435	0.0019468	0.0147858	1.55943e-05	0.00170334	0.00201703	0.00204153	0.00283833	1.77746e-05	0.000650198	0.000805085
total - Hospital Beds	p	0.751661	0.476126	4.35805e-06	0.00259862	2.61348e-05	0.00134488	0.000322386	1.95183e-05	1.18891e-05	0.000215497	0.00113534	1.31907e-06	0.00920038	0.00713226	6.18576e-06	0.000753999	0.00269686	0.000370894	0.00614636	0.0467442	0.00213705	0.00382802	0.000128385	0.00585571	9.03357e-06	0.00397322	0.00122165	0.00251734	0.00125334	0.00229047	0.0162896	1.83075e-05	0.00200283	0.00237255	0.002405	0.00333304	2.05774e-05	0.000754072	0.000932602
total - Social Benefits	p	0.509601	0.379052	5.13947e-06	0.00307301
Social Categories	Social Themes	Unit	electricity, low voltage//[ES] market for electricity, low voltage
Labor Rights & Decent Work		p	1.26
	Child Labor	p	0.09
	Forced Labor	p	0.1
	Excessive Working Time	p	0.07
	Wage Assessment	p	0.3
	Poverty	p	0.12
	Migrant Labor	p	0.17
	Collective Bargaining	p	0.32
	Social Benefits	p	0.09
Health & Safety		p	0.59
	Injuries and Fatalities	p	0.29
	Toxics and Hazards	p	0.3
Human Rights		p	0.27
	Indigenous Rights	p	0.05
	Gender Equity	p	0.1
	High Conflict	p	0.12
Governance		p	0.27
	Legal System	p	0.12
	Corruption	p	0.15
Community Infrastructure		p	0.2
	Drinking Water	p	0.04
	Improved Sanitation	p	0.07
	Hospital Beds	p	0.09
TOTAL		p	2.59
Impact Category	Unit	5gama_patata	Pienso_patata	potato starch//[RoW] potato starch production
total - Child Labor	p	0.0180453	0.0185853	0.338919
total - Forced Labor	p	0.0234173	0.0236861	0.389872
total - Excessive Working Time	p	0.0151355	0.0160557	0.335024
total - Injuries and Fatalities	p	0.0521499	0.054899	1.31392
total - Toxics and Hazards	p	0.11536	0.118315	1.17473
total - Wage Assessment	p	0.101585	0.102998	0.977076
total - Poverty	p	0.0238833	0.0249161	0.471788
total - Migrant Labor	p	0.0607185	0.0613772	0.392695
total - Collective Bargaining	p	0.137724	0.140424	1.21076
total - Indigenous Rights	p	0.00745324	0.00766274	0.0928586
total - Gender Equity	p	0.0186132	0.0194158	0.341687
total - High Conflict	p	0.0279431	0.0284373	0.456944
total - Legal System	p	0.0361423	0.0370759	0.409943
total - Corruption	p	0.0575101	0.0585554	0.493839
total - Drinking Water	p	0.00827166	0.00844104	0.176719
total - Improved Sanitation	p	0.0168718	0.0171381	0.286263
total - Hospital Beds	p	0.0153008	0.0159933	0.292208
total - Social Benefits	p	0.0170567	0.01786	0.38375

## Sheet: economic impacts raw data
ECONOMIC IMPACTS - RAW DATA
	PRODUCTS	€/Kg
	CONSUMER POTATO	1.24
	5TH RANGE POTATO
	FEED
	STARCH
		€/Kw.h			HR	€/hour
	ELECTRICAL ENERGY	0.25			COORDINATOR	35
	INDUSTRIAL WATER	0.001			TECHNICIAN	21
	5TH RANGE POTATO							unitary cost	total cost	total
		electricity medium voltage				0.278	Kwh	0.25	0.0695
		tap water				10.9	kg	0.001	0.0109
		heat				0.226	Kwh	0.25	0.0565	0.1369	€/KG
	FEED
		tap water				1.1	kg	0.001	0.0011
		heat				0.22	Kwh	0.25	0.055	0.0561	€/KG
	STARCH
		tap water				3.73	kg	0.001	0.00373
		electricity medium voltage				0.17	Kwh	0.25	0.0425
		heat, district or industrial, natural gas,market for				0.45	Kwh	0.25	0.1125	0.15873	€/KG

## Sheet: ambiental
EVALUACIÓN AMBIENTAL DE LA ACCIÓN DE REDUCCIÓN DEL DESPERDICIO ALIMENTARIO
								EX-ANTE						EX-POST
CANTIDAD INICIAL (compra):			1	KG	PATATA DE CONSUMO			PÉRDIDAS	#REF!	KG	PATATA DE CONSUMO			PÉRDIDAS	#REF!	KG	PATATA DE. CONSUMO
								APROVECHAMIENTO	#REF!					APROVECHAMIENTO	#REF!
RESULTADO DE LA ACCIÓN:			#REF!	KG	PATATA DE CONSUMO			FACTOR DE PÉRDIDA	#REF!					FACTOR DE PÉRDIDA	#REF!
								IMPACTO EX-ANTE						IMPACTO EX-POST
IMPACTO DE LA COMPRA:					Total	42.0049		IMPACTO ALIMENTO			Total	#REF!		IMPACTO ALIMENTO			Total	#REF!
					Acidification	2.17623					Acidification	#REF!					Acidification	#REF!
					Climate change	4.01392					Climate change	#REF!					Climate change	#REF!
					Ecotoxicity, freshwater	7.78293					Ecotoxicity, freshwater	#REF!					Ecotoxicity, freshwater	#REF!
					Particulate matter	2.21206					Particulate matter	#REF!					Particulate matter	#REF!
					Eutrophication, marine	3.47664					Eutrophication, marine	#REF!					Eutrophication, marine	#REF!
					Eutrophication, freshwater	4.42129					Eutrophication, freshwater	#REF!					Eutrophication, freshwater	#REF!
					Eutrophication, terrestrial	1.51677					Eutrophication, terrestrial	#REF!					Eutrophication, terrestrial	#REF!
					Human toxicity, cancer	0.414156					Human toxicity, cancer	#REF!					Human toxicity, cancer	#REF!
					Human toxicity, non-cancer	1.60392					Human toxicity, non-cancer	#REF!					Human toxicity, non-cancer	#REF!
					Ionising radiation	0.0799255					Ionising radiation	#REF!					Ionising radiation	#REF!
					Land use	1.30045					Land use	#REF!					Land use	#REF!
					Ozone depletion	0.0352563					Ozone depletion	#REF!					Ozone depletion	#REF!
					Photochemical ozone formation	0.640837					Photochemical ozone formation	#REF!					Photochemical ozone formation	#REF!
					Resource use, fossils	1.84712					Resource use, fossils	#REF!					Resource use, fossils	#REF!
					Resource use, minerals and metals	2.45348					Resource use, minerals and metals	#REF!					Resource use, minerals and metals	#REF!
					Water use	8.02993					Water use	#REF!					Water use	#REF!
								IMPACTO RECURSOS						IMPACTO RECURSOS
											Total						Total	#REF!
											Acidification			energía eléctrica (autom.)	#REF!	Kwh/KG	Acidification	#REF!
											Climate change			5ª gama	#REF!	KG	Climate change	#REF!
											Ecotoxicity, freshwater			pienso animal	#REF!	KG	Ecotoxicity, freshwater	#REF!
											Particulate matter			industria	#REF!	KG	Particulate matter	#REF!
											Eutrophication, marine						Eutrophication, marine	#REF!
											Eutrophication, freshwater						Eutrophication, freshwater	#REF!
											Eutrophication, terrestrial						Eutrophication, terrestrial	#REF!
											Human toxicity, cancer						Human toxicity, cancer	#REF!
											Human toxicity, non-cancer						Human toxicity, non-cancer	#REF!
											Ionising radiation						Ionising radiation	#REF!
											Land use						Land use	#REF!
											Ozone depletion						Ozone depletion	#REF!
											Photochemical ozone formation						Photochemical ozone formation	#REF!
											Resource use, fossils						Resource use, fossils	#REF!
											Resource use, minerals and metals						Resource use, minerals and metals	#REF!
											Water use						Water use	#REF!
																					RESULTADO DE LA ACCIÓN:	REDUCCIÓN:	#REF!	KG	PATATA DE CONSUMO
								IMPACTO TOTAL						IMPACTO TOTAL
											Total	#REF!					Total	#REF!			IMPACTOS REDUCIDOS	Total	#REF!				Impact categories	Impact reduction (µPt/KG)
											Acidification	#REF!					Acidification	#REF!			µPt/KG	Acidification	#REF!				Acidification	-0.0383056
											Climate change	#REF!					Climate change	#REF!				Climate change	#REF!				Climate change	0.421038
											Ecotoxicity, freshwater	#REF!					Ecotoxicity, freshwater	#REF!				Ecotoxicity, freshwater	#REF!				Ecotoxicity, freshwater	6.36283
			Ex-ante	Ex-post							Particulate matter	#REF!					Particulate matter	#REF!				Particulate matter	#REF!				Particulate matter	0.0987976
		Acidification	#REF!	#REF!							Eutrophication, marine	#REF!					Eutrophication, marine	#REF!				Eutrophication, marine	#REF!				Eutrophication, marine	1.96726
		Climate change	#REF!	#REF!							Eutrophication, freshwater	#REF!					Eutrophication, freshwater	#REF!				Eutrophication, freshwater	#REF!				Eutrophication, freshwater	3.24895
		Ecotoxicity, freshwater	#REF!	#REF!							Eutrophication, terrestrial	#REF!					Eutrophication, terrestrial	#REF!				Eutrophication, terrestrial	#REF!				Eutrophication, terrestrial	-0.0543918
		Particulate matter	#REF!	#REF!							Human toxicity, cancer	#REF!					Human toxicity, cancer	#REF!				Human toxicity, cancer	#REF!				Human toxicity, cancer	0.203735
		Eutrophication, marine	#REF!	#REF!							Human toxicity, non-cancer	#REF!					Human toxicity, non-cancer	#REF!				Human toxicity, non-cancer	#REF!				Human toxicity, non-cancer	0.726617
		Eutrophication, freshwater	#REF!	#REF!							Ionising radiation	#REF!					Ionising radiation	#REF!				Ionising radiation	#REF!				Ionising radiation	-0.198946
		Eutrophication, terrestrial	#REF!	#REF!							Land use	#REF!					Land use	#REF!				Land use	#REF!				Land use	0.739509
		Human toxicity, cancer	#REF!	#REF!							Ozone depletion	#REF!					Ozone depletion	#REF!				Ozone depletion	#REF!				Ozone depletion	0.017183
		Human toxicity, non-cancer	#REF!	#REF!							Photochemical ozone formation	#REF!					Photochemical ozone formation	#REF!				Photochemical ozone formation	#REF!				Photochemical ozone formation	-0.0240342
		Ionising radiation	#REF!	#REF!							Resource use, fossils	#REF!					Resource use, fossils	#REF!				Resource use, fossils	#REF!				Resource use, fossils	-0.368895
		Land use	#REF!	#REF!							Resource use, minerals and metals	#REF!					Resource use, minerals and metals	#REF!				Resource use, minerals and metals	#REF!				Resource use, minerals and metals	0.685133
		Ozone depletion	#REF!	#REF!							Water use	#REF!					Water use	#REF!				Water use	#REF!				Water use	4.23723
		Photochemical ozone formation	#REF!	#REF!																							Single Overall Score	18.0237
		Resource use, fossils	#REF!	#REF!
		Resource use, minerals and metals	#REF!	#REF!
		Water use	#REF!	#REF!
